# Supplementary material
Source: PubMed Central journal article supplement (PMC4506261)
Supplement: NIHMS678510-supplement-Online_supp.pdf [file NIHMS678510-supplement-Online_supp.pdf]

## ONLINE RESOURCES

### **Genetic and genomic analysis of RNases in model cyanobacteria**

Jeffrey C. Cameron<sup>1</sup>, Gina C. Gordon<sup>1,2</sup>, and Brian F. Pflieger<sup>1,2</sup>

1. Department of Chemical and Biological Engineering, University of Wisconsin-Madison

2. Microbiology Doctoral Training Program, University of Wisconsin-Madison

# Corresponding Author – 3629 Engineering Hall, 1415 Engineering Dr., Madison, WI 53706, United States. Phone: +1 608 890 1940. Fax: +1 608 262-5434. E-mail address: [pflieger@engr.wisc.edu](mailto:pflieger@engr.wisc.edu)

---

**Online Resource 1** Plasmids used in this study

---

| <b>Plasmid ID</b> | <b>Description/Purpose</b>                            | <b>Resistance marker</b> | <b>Reference</b>       |
|-------------------|-------------------------------------------------------|--------------------------|------------------------|
| pJCC248           | pUC19- $\Delta A0788$ :Km <sup>R</sup>                | Amp/Km                   | This work              |
| pJCC249           | pUC19- $\Delta A0061$ :Sp <sup>R</sup>                | Amp/Sp                   | This work              |
| pJCC250           | pUC19- $\Delta A2542$ :Km <sup>R</sup>                | Amp/Km                   | This work              |
| pJCC251           | pUC19- $\Delta A0384$ :Gm <sup>R</sup>                | Amp/Gm                   | This work              |
| pJCC252           | pUC19- $\Delta A1273$ :Km <sup>R</sup>                | Amp/Km                   | This work              |
| pJCC253           | pUC19- $\Delta A0574$ :Sp <sup>R</sup>                | Amp/Sp                   | This work              |
| pJCC254           | pUC19- $\Delta A1543$ :Sp <sup>R</sup>                | Amp/Sp                   | This work              |
| pJCC255           | pUC19- $\Delta A1066$ :Gm <sup>R</sup>                | Amp/Gm                   | This work              |
| pJCC256           | pUC19- $\Delta glpK$ :Amp <sup>R</sup> - <i>A0061</i> | Amp                      | This work              |
| pJCC257           | pUC19- $\Delta glpK$ :Km <sup>R</sup> - <i>A1543</i>  | Km                       | This work              |
| pUC19             | Cloning vector                                        | Amp                      | Invitrogen             |
| pSRA81            | Source of Sp <sup>R</sup>                             | Sp                       | (Frigaard et al. 2004) |
| pBBR1MCS5         | Source of Gm <sup>R</sup>                             | Gm                       | (Kovach et al. 1995)   |
| pET28b(+)         | Source of Km <sup>R</sup>                             | Km                       | Novagen                |

---

Frigaard NU, Maresca JA, Yunker CE, Jones AD, Bryant DA (2004) Genetic manipulation of carotenoid biosynthesis in the green sulfur bacterium *Chlorobium tepidum*. *J Bacteriol* 186 (16):5210-5220

Kovach ME, Elzer PH, Hill DS, Robertson GT, Farris MA, Roop RM, 2nd, Peterson KM (1995) Four new derivatives of the broad-host-range cloning vector pBBR1MCS, carrying different antibiotic-resistance cassettes. *Gene* 166 (1):175-176

---

**Online Resource 2** Oligonucleotides used in this study for generation of plasmids and segregation analysis

| Oligo ID             | Sequence (5'-3')                                      | Description           | Purpose        | Reference |
|----------------------|-------------------------------------------------------|-----------------------|----------------|-----------|
| <b>ΔA0788 strain</b> |                                                       |                       |                |           |
| JC128                | gctcggtagccggggatcctCGATATCGATCACGTCGC                | A0788_upstream_F      | KO/Segregation | This work |
| JC129                | tgagcgtcagTCAAATTCCTCGATTTTTTTC                       | A0788_upstream_R      | KO             | This work |
| JC130                | aggaattgaCTGACGCTCAGTGGAAACG                          | KmR_F                 | KO             | This work |
| JC131                | taattgggtTTCAGGTGGCACTTTTCG                           | KmR_R                 | KO             | This work |
| JC132                | gccacctgaaAACCCAATTACCGTTAACCTAAGG                    | A0788_downstream_F    | KO             | This work |
| JC133                | tgcatgctgcaggtcgactCGGACTTCAGCGACGGTG                 | A0788_downstream_R    | KO/Segregation | This work |
| JC146                | ACATGGATTCTCGCCATGAT                                  | A0788_gene_specific_F | Segregation    | This work |
| JC147                | CGGCTTACTCGAAACCTCTG                                  | A0788_gene_specific_R | Segregation    | This work |
| JC172                | TCATCTCACCCAGCCATACA                                  | A0788_flanking_F      | Segregation    | This work |
| JC173                | GGGCTTGTAACAGACTTGC                                   | A0788_flanking_R      | Segregation    | This work |
| <b>ΔA0061 strain</b> |                                                       |                       |                |           |
| JC42                 | gctcggtagccggggatcctTCTTGCCCCATAAGCAG                 | A0061_upstream_F      | KO/Segregation | This work |
| JC43                 | aattcactggAAAAGCGCCGGAGATCT                           | A0061_upstream_R      | KO             | This work |
| JC44                 | gggctctttCCAGTGAATTCGAGCTCGG                          | SpR_F                 | KO             | This work |
| JC45                 | tagtattccCAAGCTTGCATCCCTGCA                           | SpR_R                 | KO             | This work |
| JC46                 | tgcaagcttgGAAATACTAAGATAGCAAAAGTAGGGAACCTTTCG         | A0061_downstream_F    | KO             | This work |
| JC47                 | tgcatgctgcaggtcgactGCAGCGGCAATCCACGTC                 | A0061_downstream_R    | KO/Segregation | This work |
| JC140                | TCCCCGACAAAAATTATGA                                   | A0061_gene_specific_F | Segregation    | This work |
| JC141                | AGCAAAGTATCCCCAGCTT                                   | A0061_gene_specific_R | Segregation    | This work |
| <b>ΔA2542 strain</b> |                                                       |                       |                |           |
| JC48                 | gctcggtagccggggatcctATGATCACGGGATATATTG               | A2542_upstream_F      | KO/Segregation | This work |
| JC49                 | agaccctgtaGGTTAAGCGAAACTTATAATG                       | A2542_upstream_R      | KO             | This work |
| JC50                 | tcgcttaaccTACGGGGTCTGACGCTCA                          | KmR_F                 | KO             | This work |
| JC51                 | tctgcccgaGATTTTGCCGATTTTCGGC                          | KmR_R                 | KO             | This work |
| JC52                 | cggaacaatcTTGGGCGAGAAAATGGCT                          | A2542_downstream_F    | KO             | This work |
| JC53                 | tgcatgctgcaggtcgactAAAGCAATCTCGTTATCAAAAG             | A2542_downstream_R    | KO/Segregation | This work |
| JC142                | GCGATCGCTCTTCTGTATC                                   | A2542_gene_specific_F | Segregation    | This work |
| JC143                | GAATTTCACCGTGGTTTGTCT                                 | A2542_gene_specific_R | Segregation    | This work |
| <b>ΔA0384 strain</b> |                                                       |                       |                |           |
| JC134                | gctcggtagccggggatcctCAGCAAAAAATCTGTAGTTTG             | A0384_upstream_F      | KO/Segregation | This work |
| JC135                | tatgcatgegTGGTTTTCTCGTCCCTAT                          | A0384_upstream_R      | KO             | This work |
| JC136                | gagaaaaaccaCGCATGCATAAAAACTGTTG                       | GmR_F                 | KO             | This work |
| JC137                | gtcgatcataTTAGGTGGCGGTACTTGG                          | GmR_R                 | KO             | This work |
| JC138                | cgccacactaaTATGATCGACTCTTTTGTGTTTC                    | A0384_downstream_F    | KO             | This work |
| JC139                | tgcatgctgcaggtcgactTGGGGCGTCTTTTATTCG                 | A0384_downstream_R    | KO/Segregation | This work |
| JC144                | GTCCTGACATACCGCTGA                                    | A0384_gene_specific_F | Segregation    | This work |
| JC145                | CAGACCGTCTTGGGGTAAA                                   | A0384_gene_specific_R | Segregation    | This work |
| <b>ΔA1273 strain</b> |                                                       |                       |                |           |
| JC60                 | gctcggtagccggggatcctGCGCTGGCCATTAACAG                 | A1273_upstream_F      | KO/Segregation | This work |
| JC61                 | tgagcgtcagTGTAGGAAAAGGATTTGGGATC                      | A1273_upstream_R      | KO             | This work |
| JC62                 | ttttctacaCTGACGCTCAGTGGAAACG                          | KmR_F                 | KO             | This work |
| JC63                 | aaggagttttTTCAGGTGGCACTTTTCG                          | KmR_R                 | KO             | This work |
| JC64                 | gccacctgaaAAAACCTCCTTAGATTTGCTTG                      | A1273_downstream_F    | KO             | This work |
| JC65                 | tgcatgctgcaggtcgactGATGATAGTCTAACTTACCTTTGATG         | A1273_downstream_R    | KO/Segregation | This work |
| JC174                | GCGATCATCAGACGATCAAT                                  | A1273_gene_specific_F | Segregation    | This work |
| JC175                | GGCGAAAAAGGTGTTCTCTG                                  | A1273_gene_specific_R | Segregation    | This work |
| <b>ΔA0574 strain</b> |                                                       |                       |                |           |
| JC148                | gctcggtagccggggatcctCCGAATGTCGCCAATA                  | A0574_upstream_F      | KO             | This work |
| JC149                | aattcactggCAGCTTTGTGCTTAACG                           | A0574_upstream_R      | KO             | This work |
| JC150                | aacaagctgCCAGTGAATTCGAGCTCGG                          | SpR_F                 | KO             | This work |
| JC151                | gcttttgatcCAAGCTTGCATGCCTGCA                          | SpR_R                 | KO             | This work |
| JC152                | tgcaagcttgGATCAAAAAGCCGACAAAAC                        | A0574_downstream_F    | KO             | This work |
| JC153                | tgcatgctgcaggtcgactCGGAGCTAACACCGATG                  | A0574_downstream_R    | KO             | This work |
| JC176                | TCAAACGCAAAGGGGATTAC                                  | A0574_gene_specific_F | Segregation    | This work |
| JC177                | ACTGAGGCCATCGTCAATTT                                  | A0574_gene_specific_R | Segregation    | This work |
| JC178                | TGTGCCCTTCATCAACAAA                                   | A0574_flanking_F      | Segregation    | This work |
| JC179                | TCCAAGTGGAGTTGGGATTC                                  | A0574_flanking_R      | Segregation    | This work |
| <b>ΔA1543 strain</b> |                                                       |                       |                |           |
| JC188                | gctcggtagccggggatcctCCATTGATCCAGGCGAAT                | A1543_upstream_F      | KO             | This work |
| JC189                | aattcactggTACCCGTCTATGACTCAG                          | A1543_upstream_R      | KO             | This work |
| JC190                | agacgggtgaCCAGTGAATTCGAGCTCGG                         | SpR_F                 | KO             | This work |
| JC191                | atagttttgcCAAGCTTGCATGCCTGCA                          | SpR_R                 | KO             | This work |
| JC192                | tgcaagcttgGCAAAACTATCCTTTTCGTTAGAAAAGTAAAGTGAACGACAAC | A1543_downstream_F    | KO             | This work |
| JC193                | tgcatgctgcaggtcgactGTGGGGCGATCGCCGGGG                 | A1543_downstream_R    | KO             | This work |
| JC180                | CGCGATATTCGTACCAAGTCA                                 | A1543_gene_specific_F | Segregation    | This work |
| JC181                | TCAGGAAACCTCGATGFTC                                   | A1543_gene_specific_R | Segregation    | This work |
| JC182                | AAAAAGAGGGAAGCATGCAA                                  | A1543_flanking_F      | Segregation    | This work |
| JC183                | TATGCTGGGTTTGTCTAGCC                                  | A1543_flanking_R      | Segregation    | This work |
| <b>ΔA1066 strain</b> |                                                       |                       |                |           |
| JC160                | gctcggtagccggggatcctGAAAGAGTTGTGTTCTTGTGTC            | A1066_upstream_F      | KO             | This work |

|       |                                        |                              |             |           |
|-------|----------------------------------------|------------------------------|-------------|-----------|
| JC161 | atgcatgcgctATTGCGTGTTCCTTTTG           | <i>A1066_upstream_F</i>      | KO          | This work |
| JC162 | acacgcaataGCGCATGCATAAAAACTGTTGTAATTC  | GmR_F                        | KO          | This work |
| JC163 | atgtttatattAAACAGGCCACGCGCCAG          | GmR_R                        | KO          | This work |
| JC164 | gggcctgtttAAATATAAAACATCACTATTTTTCGGTG | <i>A1066_downstream_F</i>    | KO          | This work |
| JC165 | tgcattcctgcaggtcgactGTCAATGATGCCCGCTGA | <i>A1066_downstream_R</i>    | KO          | This work |
| JC200 | TTCGGCTCTTCGTGGTTTT                    | <i>A1066_gene_specific_R</i> | Segregation | This work |
| JC197 | TTGGGAGTTCAAGGAACCAG                   | <i>A1066_flanking_F</i>      | Segregation | This work |
| JC198 | CGTTGAAAAGGGGTTTGAGA                   | <i>A1066_flanking_R</i>      | Segregation | This work |

#### Complementation Analysis

|        |                                                               |                                  |                                    |           |
|--------|---------------------------------------------------------------|----------------------------------|------------------------------------|-----------|
| JCC207 | agctcggtaccgggTGAAGCGATTGGCTATGATC                            | <i>glpK_upstream_F</i>           | for pUC19- $\Delta$ <i>glpK_NS</i> | This work |
| JCC208 | ggggatccTTTTTTAAATGGGTAAATTAGGTC                              | <i>glpK_upstream_BamHI_R</i>     | for pUC19- <i>glpK_NS</i>          | This work |
| JCC209 | ccatttaaaaaaggatccCCCCCTTGCCTACAGC                            | <i>glpK_downstream_BamHI_F</i>   | for pUC19- <i>glpK_NS</i>          | This work |
| JCC210 | caggtcgactctagagGAAACGAGATTATCTAAAACAGAAGC                    | <i>glpK_upstream_R</i>           | for pUC19- <i>glpK_NS</i>          | This work |
| JCC263 | athtaaccatttaaaaaagctcgagTACGGGGTCTGACGCTCA                   | KmR_F                            | for pUC19- <i>glpK:KmR_NS</i>      | This work |
| JCC264 | taggcaagaggggggatccGATTTTGCCGATTCGGC                          | KmR_F                            | for pUC19- <i>glpK:KmR_NS</i>      | This work |
| JCC368 | athtaaccatttaaaaaaggatccGGAAATGTGCGCGGAACC                    | AmpR_F                           | for pUC19- <i>glpK:AmpR_NS</i>     | This work |
| JCC369 | taggcaagaggggggatccACGCTCAGTGGAACGAAAAC                       | AmpR_R                           | for pUC19- <i>glpK:AmpR_NS</i>     | This work |
| JCC374 | aaccatttaaaaaagatcATGGAACCCTAAATCTGG                          | <i>A0061_terminator_region_F</i> | Complementation                    | This work |
| JCC375 | cgcgacatttccgatacTTATAGAGAGTAGACGAAAATCAC                     | <i>A0061_Promoter_region_R</i>   | Complementation                    | This work |
| JCC282 | ttaaccatttaaaaaagctcgaGAACGCAATAGGAAAAGTTAACTCAATTTATTAGTTGAG | <i>A1543_promoter_region_F</i>   | Complementation                    | This work |
| JCC283 | cgtcagacccctacCCTAGGCCACCGGGGGCC                              | <i>A1543_terminator_region_R</i> | Complementation                    | This work |
| JCC397 | TCTCGATCCTGCAAGGGG                                            | <i>glpK_flanking_F</i>           | Segregation of <i>glpK</i>         | This work |
| JCC398 | AGGCTTCATGATCAAGGGAA                                          | <i>glpK_flanking_R</i>           | Segregation of <i>glpK</i>         | This work |
| JCC399 | CACCGCTGGGGCTTGTACC                                           | <i>glpK_gene_specific_R</i>      | Segregation of <i>glpK</i>         | This work |

Uppercase nucleotides are gene-specific; lowercase indicate homologous flanking regions for Gibson assembly reaction. KO, generation of knock out mutant. NS, neutral site.

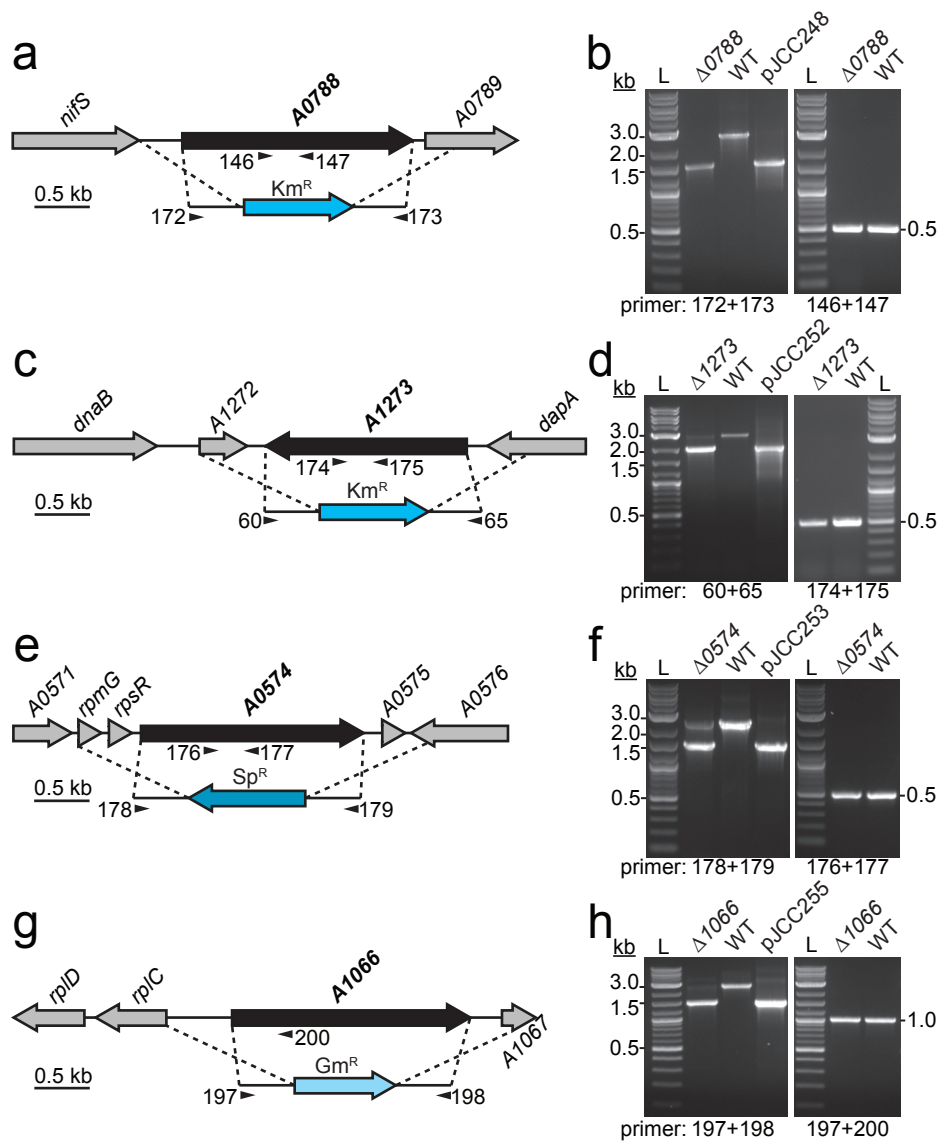

### Online Resource 3 Segregation analysis of ribonucleases in PCC7002

Targeted gene deletion via homologous recombination was used to replace the entire ORF of *A0788*, *A1273*, *A0574*, and *A1066* with an antibiotic resistance cassette (**a**, **c**, **e**, and **g**). Insertion of the cassette into each of these genes was confirmed by PCR using primer pairs flanking the insert (Left gel panel in **b**, **d**, **f**, and **h**). WT genomic DNA was used as the negative control and the plasmid (pJCC#) used to generate the strain was used as a positive size control. PCR using primers that amplify the WT gene (Right gel panel in **b**, **d**, **f**, and **h**) indicates that these strains are heterozygous at the locus of interest. Arrows and numbers below antibiotic resistance cassette and gene in **a**, **c**, **e**, and **g** indicate approximate regions of flanking and gene specific primers respectively. For the gene specific reaction shown in **g** and **h**, a flanking primer and gene specific primer combination was used to amplify a 1 kb band that should not be present in a fully segregated mutant. Plasmids used as the positive control are listed in Online Resource 1. All primers used in segregation analysis are listed in Online Resource 2.

Online Resource 4 Analysis of RNase III-like proteins in diverse cyanobacterial genomes

| Genome                                      | Subsection <sup>a</sup> | #RNase III, #MiniIII | RNase III Locus Tag         | Mini-III Locus Tag          | AA Seq Length | RNase III Signature Motif | Mini-III Signature Motif | #RNase III domains | dsRBD Present | Other Domains |
|---------------------------------------------|-------------------------|----------------------|-----------------------------|-----------------------------|---------------|---------------------------|--------------------------|--------------------|---------------|---------------|
| <i>Acaryochloris marina</i> MBIC11017       | 1                       | 1,1                  | AM1_1717                    |                             | 247           | EQLEFVGDS                 |                          | 1                  | Y             |               |
| <i>Anabaena cylindrica</i> PCC 7122         | 4                       | 3,1                  | Anacy_4655                  | AM1_5197                    | 143           | ERLEFLGDA                 | AALAYIGDA                | 1                  | N             |               |
|                                             |                         |                      | Anacy_0811                  |                             | 228           | ERLEFLGDA                 |                          | 1                  | Y             |               |
|                                             |                         |                      | Anacy_3962                  |                             | 240           | EQLEFVGDA                 |                          | 1                  | Y             |               |
|                                             |                         |                      |                             |                             | 395           | EQLEFLGDC                 |                          | 1                  | Y             |               |
| <i>Anabaena</i> sp. PCC 7108                | 4                       | 2,1                  | Ana7108_1646                | Anacy_3641                  | 160           |                           | SALAYLGDS                | 1                  | N             |               |
|                                             |                         |                      | Ana7108_0695                |                             | 230           | ERLEFLGDA                 |                          | 1                  | Y             |               |
|                                             |                         |                      |                             |                             | 245           | EQLEFVGDA                 |                          | 1                  | Y             |               |
| <i>Anabaena</i> sp. PCC 7120                | 4                       | 2,1                  | all4107                     | Ana7108_2529                | 193           |                           | SALAYLGDA                | 1                  | N             |               |
|                                             |                         |                      | alr0280                     |                             | 202           | EQLEFVGDA                 |                          | 1                  | Y             |               |
|                                             |                         |                      |                             |                             | 228           | ERLEFLGDA                 |                          | 1                  | Y             |               |
| <i>Anabaena variabilis</i> ATCC 29413       | 4                       | 2,1                  | Ava_3081                    | alr1158                     | 161           |                           | AALAYVGDA                | 1                  | N             |               |
|                                             |                         |                      | Ava_0797                    |                             | 228           | ERLEFLGDA                 |                          | 1                  | Y             |               |
|                                             |                         |                      |                             |                             | 242           | EQLEFVGDA                 |                          | 1                  | Y             |               |
| <i>Arthrospira platensis</i> NIES-39        | 3                       | 2,0                  | NIES39_Q02990               | Ava_4412                    | 161           |                           | AALAYVGDA                | 1                  | N             |               |
|                                             |                         |                      | NIES39_N00330               |                             | 246           | EQLEFVGDS                 |                          | 1                  | Y             |               |
| <i>Calothrix</i> sp. PCC 6303               | 4                       | 2,1                  | Cal6303_1320                |                             | 395           | ELLEFLGDS                 |                          | 1                  | Y             |               |
|                                             |                         |                      | Cal6303_1680                |                             | 228           | ERLEFLGDA                 |                          | 1                  | Y             |               |
|                                             |                         |                      |                             |                             | 239           | EQLEFVGDA                 |                          | 1                  | Y             |               |
| <i>Calothrix</i> sp. PCC 7103               | 4                       | 2,1                  | Cal7103DRAFT_00026520       | Cal6303_1532                | 160           |                           | KSLAYLGDA                | 1                  | N             |               |
|                                             |                         |                      | Cal7103DRAFT_00079520       |                             | 240           | EQLEFVGDA                 |                          | 1                  | Y             |               |
| <i>Calothrix</i> sp. PCC 7507               | 4                       | 2,1                  | Cal7507_4153                | Cal7103DRAFT_00060540       | 164           |                           | TALAYLGDA                | 1                  | N             |               |
|                                             |                         |                      | Cal7507_3430                |                             | 227           | ERLEFLGDA                 |                          | 1                  | Y             |               |
|                                             |                         |                      |                             |                             | 237           | EQLEFVGDA                 |                          | 1                  | Y             |               |
| <i>Chroococcidiopsis</i> sp. PCC 6712       | 2                       | 2,1                  | Chr6712_2695                | Cal7507_1114                | 159           |                           | TALAYMGDA                | 1                  | N             |               |
|                                             |                         |                      | Chr6712_3177                |                             | 238           | ERLEFLGDA                 |                          | 1                  | Y             |               |
| <i>Chroococcidiopsis thermalis</i> PCC 7203 | 2                       | 2,1                  | Chro_4112                   | Chr6712_4648                | 244           | EQLEFVGDA                 |                          | 1                  | Y             |               |
|                                             |                         |                      | Chro_5889                   |                             | 152           |                           | VALAYIGDA                | 1                  | N             |               |
|                                             |                         |                      |                             |                             | 237           | EQLEFVGDA                 |                          | 1                  | Y             |               |
| <i>Crocospaera watsonii</i> WH 8501         | 1                       | 2,1                  | CWat_WH8501_draft2_00045690 | Chro_4036                   | 493           | EWLALLGDT                 |                          | 2                  | N             | Gun4-like     |
|                                             |                         |                      | CWat_WH8501_draft2_00017180 |                             | 169           |                           | MALAYLGDA                | 1                  | N             |               |
|                                             |                         |                      |                             |                             | 238           | QQLEFVGDS                 |                          | 1                  | Y             |               |
| <i>Cyanobacterium</i> PCC 7702              | 5                       | 2,1                  | Ch17702DRAFT_0536           | CWat_WH8501_draft2_00007740 | 328           | QRLESLGEN                 |                          | 1                  | N             |               |
|                                             |                         |                      | Ch17702DRAFT_2265           |                             | 137           |                           | AFLAYIGDA                | 1                  | N             |               |
|                                             |                         |                      |                             |                             | 225           | ERLEFLGDA                 |                          | 1                  | Y             |               |
| <i>Cyanobacterium</i> sp. UCYN-A            | 1                       | 1,1                  | UCYN_03680                  | Ch17702DRAFT_2383           | 244           | EHLEFVGDA                 |                          | 1                  | Y             |               |
|                                             |                         |                      |                             |                             | 160           |                           | TTLAYLGDA                | 1                  | N             |               |
| <i>Cyanothece</i> sp. BH68, ATCC 51142      | 1                       | 1,1                  | cce_3135                    | UCYN_00750                  | 243           | QQLEFVGDS                 |                          | 1                  | Y             |               |
|                                             |                         |                      |                             |                             | 137           |                           | AFLAYIGDA                | 1                  | N             |               |
| <i>Cyanothece</i> sp. PCC 7424              | 1                       | 2,1                  | PCC7424_3959                | cce_1800                    | 242           | QQLEFVGDS                 |                          | 1                  | Y             |               |
|                                             |                         |                      | PCC7424_2664                |                             | 137           |                           | AFLAYIGDA                | 1                  | N             |               |
| <i>Cyanothece</i> sp. PCC 7425              | 1                       | 1,1                  | Cyan7425_0389               | PCC7424_3194                | 154           |                           | ASLAYIGDA                | 1                  | N             |               |
|                                             |                         |                      |                             |                             | 238           | EQLEFVGDA                 |                          | 1                  | Y             |               |
| <i>Cyanothece</i> sp. PCC 7822              | 1                       | 2,1                  | Cyan7822_0327               | Cyan7425_1940               | 153           |                           | AALAYLGDA                | 1                  | N             |               |
|                                             |                         |                      | Cyan7822_1001               |                             | 228           | ERLEFLGDA                 |                          | 1                  | Y             |               |
| <i>Cyanothece</i> sp. PCC 8801              | 1                       | 3,1                  | PCC8801_3303                | Cyan7822_0774               | 235           | QQLEFVGDA                 |                          | 1                  | Y             |               |
|                                             |                         |                      | PCC8801_2820                |                             | 131           |                           | ASLAYIGDA                | 1                  | N             |               |
|                                             |                         |                      | PCC8801_0645                |                             | 225           | ERLEFLGDA                 |                          | 1                  | Y             |               |
| <i>Dactylococcopsis salina</i> PCC 8305     | 1                       | 2,1                  | Daesa_1083                  | PCC8801_2425                | 236           | QQLEFLGDS                 |                          | 1                  | Y             |               |
|                                             |                         |                      | Daesa_3634                  |                             | 323           | ERLEFLGDA                 |                          | 1                  | N             |               |
|                                             |                         |                      |                             |                             | 158           |                           | AFLAYLGDA                | 1                  | N             |               |
| <i>Fischerella</i> sp. PCC 9339             | 5                       | 2,1                  | PCC9339DRAFT_01064          | Daesa_2494                  | 237           | ERLEFLGDA                 |                          | 1                  | Y             |               |
|                                             |                         |                      | PCC9339DRAFT_03154          |                             | 264           | QQLEFVGDA                 |                          | 1                  | Y             |               |
|                                             |                         |                      |                             |                             | 150           |                           | AALAYIGDA                | 1                  | N             |               |
| <i>Fischerella</i> sp. PCC 9431             | 5                       | 2,1                  | Fis9431DRAFT_3759           | PCC9339DRAFT_04090          | 224           | ERLEFLGDA                 |                          | 1                  | Y             |               |
|                                             |                         |                      | Fis9431DRAFT_1534           |                             | 239           | EHLEFVGDA                 |                          | 1                  | Y             |               |
|                                             |                         |                      |                             |                             | 160           |                           | VALAYLGDA                | 1                  | N             |               |
| <i>Fischerella</i> sp. PCC 9605             | 5                       | 2,1                  | FIS9605DRAFT_02642          | Fis9431DRAFT_4808           | 160           |                           | VALAYLGDA                | 1                  | N             |               |
|                                             |                         |                      | FIS9605DRAFT_04201          |                             | 239           | EHLEFVGDA                 |                          | 1                  | Y             |               |
|                                             |                         |                      |                             |                             | 232           | ERLEFLGDA                 |                          | 1                  | Y             |               |
| <i>Geitlerinema</i> sp. PCC 7105            | 3                       | 2,0                  | Gei7105DRAFT_1223           | FIS9605DRAFT_03180          | 243           | EHLEFVGDA                 |                          | 1                  | Y             |               |
|                                             |                         |                      | Gei7105DRAFT_5151           |                             | 159           |                           | TALAYLGDA                | 1                  | N             |               |
| <i>Geitlerinema</i> sp. PCC 7407            | 3                       | 2,1                  | GEI7407_1007                |                             | 247           | EQLEFVGDA                 |                          | 1                  | Y             |               |
|                                             |                         |                      | GEI7407_0526                |                             | 366           | ERLEFLGDS                 |                          | 1                  | Y             |               |
|                                             |                         |                      |                             |                             | 231           | ERLEFLGDA                 |                          | 1                  | Y             |               |
| <i>Gloeobacter violaceus</i> PCC 7421       | 1                       | 1,1                  | gvip371                     | GEI7407_3792                | 246           | EQLEFMGDA                 |                          | 1                  | Y             |               |
|                                             |                         |                      |                             |                             | 167           |                           | VALAYLGDA                | 1                  | N             |               |
| <i>Leptolyngbya boryana</i> PCC 6306        | 3                       | 1,1                  | LepboDRAFT_1185             | glr4180                     | 106           | DRLEFLGDE                 |                          | 1                  | Y             |               |
|                                             |                         |                      |                             |                             | 242           |                           | VALAYLGDA                | 1                  | N             |               |
| <i>Leptolyngbya</i> sp. PCC 6406            | 3                       | 3,1                  | LEP6406DRAFT_2207           | LepboDRAFT_4252             | 238           | EQLEFVGDA                 |                          | 1                  | Y             |               |
|                                             |                         |                      | LEP6406DRAFT_1871           |                             | 139           |                           | AAFAYLGDA                | 1                  | N             |               |
|                                             |                         |                      | LEP6406DRAFT_1169           |                             | 133           | ERLEFVGDS                 |                          | 1                  | N             |               |
| <i>Leptolyngbya</i> sp. PCC 7375            | 3                       | 3,1                  | Lepto7375DRAFT_7811         | LEP6406DRAFT_3537           | 224           | ERLEFLGDA                 |                          | 1                  | Y             |               |
|                                             |                         |                      | Lepto7375DRAFT_5336         |                             | 254           | EQLEFLGDA                 |                          | 1                  | Y             |               |
|                                             |                         |                      | Lepto7375DRAFT_3393         |                             | 166           |                           | QALAYIGDA                | 1                  | N             |               |
| <i>Leptolyngbya</i> sp. PCC 7376            | 3                       | 2,1                  | Lepto7376_1012              | Lepto7375DRAFT_2718         | 154           |                           | IALAYIGDA                | 1                  | N             |               |
|                                             |                         |                      | Lepto7376_0760              |                             | 153           | EIFRTLGDA                 |                          | 1                  | N             |               |
|                                             |                         |                      |                             |                             | 223           | ERLEFLGDA                 |                          | 1                  | Y             |               |
| <i>Mastigocladopsis repens</i> PCC 10914    | 5                       | 2,1                  | Mas10914DRAFT_2231          |                             | 256           | EVLEFLGDA                 |                          | 1                  | Y             |               |
|                                             |                         |                      | Mas10914DRAFT_2728          |                             | 241           | EVLEFLGDA                 |                          | 1                  | Y             |               |
|                                             |                         |                      |                             |                             | 258           | ERLEFLGDA                 |                          | 1                  | Y             |               |
| <i>Microcoleus vaginatus</i> FGP-2          | 3                       | 3,1                  | MicvaDRAFT_0740             | Lepto7376_3431              | 129           |                           | TALAYVGDA                | 1                  | N             |               |
|                                             |                         |                      | MicvaDRAFT_1301             |                             | 239           | EHLEFVGDA                 |                          | 1                  | Y             |               |
|                                             |                         |                      | MicvaDRAFT_0189             |                             | 388           | ERLEFLGDA                 |                          | 1                  | Y             |               |
| <i>Microcystis aeruginosa</i> NIES-843      | 1                       | 2,1                  | MAE_31570                   | Mas10914DRAFT_3118          | 160           |                           | TALAYLGDA                | 1                  | N             |               |
|                                             |                         |                      |                             |                             | 235           | EQLEFVGDA                 |                          | 1                  | Y             |               |
|                                             |                         |                      |                             |                             | 237           | RLEFLGDA                  |                          | 1                  | Y             |               |
|                                             |                         |                      |                             |                             | 588           | KRSLSLGGA                 |                          | 1                  | N             |               |
|                                             |                         |                      |                             |                             | 148           |                           | AAWAYLGDA                | 1                  | N             |               |
|                                             |                         |                      |                             |                             | 226           | ERLEFLGDA                 |                          | 1                  | Y             |               |

|                                                   |     |     |                             |                             |  |     |           |           |   |   |
|---------------------------------------------------|-----|-----|-----------------------------|-----------------------------|--|-----|-----------|-----------|---|---|
|                                                   |     |     | <i>MAE_60800</i>            |                             |  | 234 | EQLEFVGDS |           | 1 | Y |
|                                                   |     |     |                             | <i>MAE_28410</i>            |  | 138 |           | ASLAYLGD  | 1 | N |
| <i>Nostoc azollae</i> 0708                        | 4   | 2,1 | <i>Aazo_4580</i>            |                             |  | 227 | ERLEFLGD  |           | 1 | Y |
|                                                   |     |     | <i>Aazo_3201</i>            |                             |  | 237 | EQLEFVGDS |           | 1 | Y |
|                                                   |     |     |                             | <i>Aazo_2284</i>            |  | 159 |           | SALAYLGD  | 1 | N |
| <i>Nostoc punctiforme</i> PCC 73102               | 4   | 2,1 | <i>Npun_R1331</i>           |                             |  | 228 | ERLEFLGD  |           | 1 | Y |
|                                                   |     |     | <i>Npun_F1233</i>           |                             |  | 239 | EQLEFVGDS |           | 1 | Y |
|                                                   |     |     |                             | <i>Npun_R1191</i>           |  | 159 |           | TALAYLGD  | 1 | N |
| <i>Nostoc sp.</i> PCC 7107                        | 4   | 3,1 | <i>Nos7107_4879</i>         |                             |  | 227 | ERLEFLGD  |           | 1 | Y |
|                                                   |     |     | <i>Nos7107_2456</i>         |                             |  | 234 | EVLEFFGDS |           | 1 | Y |
|                                                   |     |     | <i>Nos7107_0948</i>         |                             |  | 239 | EQLEFVGDS |           | 1 | Y |
|                                                   |     |     |                             | <i>Nos7107_3662</i>         |  | 160 |           | AALAYIGD  | 1 | N |
| <i>Nostoc sp.</i> PCC 7524                        | 4   | 3,1 | <i>Nos7524_1070</i>         |                             |  | 228 | ERLEFLGD  |           | 1 | Y |
|                                                   |     |     | <i>Nos7524_4545</i>         |                             |  | 234 | EVLEFFGDS |           | 1 | Y |
|                                                   |     |     | <i>Nos7524_1546</i>         |                             |  | 238 | EQLEFVGDS |           | 1 | Y |
|                                                   |     |     |                             | <i>Nos7524_3113</i>         |  | 159 |           | AALAYVGD  | 1 | N |
| <i>Oscillatoria nigro-viridis</i> PCC 7112        | 3   | 3,1 | <i>Osc7112_2758</i>         |                             |  | 230 | ERLEFLGD  |           | 1 | Y |
|                                                   |     |     | <i>Osc7112_3480</i>         |                             |  | 234 | EQLEFVGDS |           | 1 | Y |
|                                                   |     |     | <i>Osc7112_2759</i>         |                             |  | 400 | QLLEFLGD  |           | 1 | Y |
|                                                   |     |     |                             | <i>Osc7112_2944</i>         |  | 148 |           | AAWAYLGD  | 1 | N |
| <i>Pleurocapsa sp.</i> PCC 7319                   | 2   | 3,1 | <i>Pleur7313DRAFT_05633</i> |                             |  | 240 | ERLEFLGD  |           | 1 | Y |
|                                                   |     |     | <i>Pleur7313DRAFT_00733</i> |                             |  | 246 | EQLEFVGDS |           | 1 | Y |
|                                                   |     |     | <i>Pleur7313DRAFT_05876</i> |                             |  | 319 | QRLEFLGK  |           | 1 | N |
|                                                   |     |     |                             | <i>Pleur7313DRAFT_05600</i> |  | 158 |           | IALAYIGD  | 1 | N |
| <i>Pleurocapsa sp.</i> PCC 7327                   | 2   | 2,1 | <i>Ple7327_4215</i>         |                             |  | 228 | ERLEFLGDS |           | 1 | Y |
|                                                   |     |     | <i>Ple7327_0296</i>         |                             |  | 244 | QQLEFVGDA |           | 1 | Y |
|                                                   |     |     |                             | <i>Ple7327_2958</i>         |  | 152 |           | IALAYIGD  | 1 | N |
| <i>Prochlorococcus marinus</i> AS9601             | 1   | 1,1 | <i>A9601_18131</i>          |                             |  | 249 | EKLEFFGDA |           | 1 | Y |
|                                                   |     |     |                             | <i>A9601_09111</i>          |  | 132 |           | IQLAWLGD  | 1 | N |
| <i>Prochlorococcus marinus marinus</i> CCMP 1375  | 1   | 1,1 | <i>Pro1762</i>              |                             |  | 249 | ERLEFQGD  |           | 1 | Y |
|                                                   |     |     |                             | <i>Pro0747</i>              |  | 137 |           | LQLAWLGD  | 1 | N |
| <i>Prochlorococcus marinus</i> MIT 9211           | 1   | 1,1 | <i>P9211_17271</i>          |                             |  | 249 | ERLEFLGD  |           | 1 | Y |
|                                                   |     |     |                             | <i>P9211_06951</i>          |  | 144 |           | LQLAWLGD  | 1 | N |
| <i>Prochlorococcus marinus</i> MIT 9215           | 1   | 1,1 | <i>P9215_18771</i>          |                             |  | 249 | EKLEFFGDA |           | 1 | Y |
|                                                   |     |     |                             | <i>P9215_09411</i>          |  | 132 |           | IQLAWLGD  | 1 | N |
| <i>Prochlorococcus marinus</i> MIT 9301           | 1   | 1,1 | <i>P9301_17961</i>          |                             |  | 249 | EKLEFFGDA |           | 1 | Y |
|                                                   |     |     |                             | <i>P9301_09091</i>          |  | 132 |           | IQLAWLGD  | 1 | N |
| <i>Prochlorococcus marinus</i> MIT 9303           | 1   | 1,1 | <i>P9303_26001</i>          |                             |  | 262 | ERLEFLGD  |           | 1 | Y |
|                                                   |     |     |                             | <i>P9303_15791</i>          |  | 135 |           | LQLAWLGD  | 1 | N |
| <i>Prochlorococcus marinus</i> MIT 9312           | 1   | 1,1 | <i>PMT9312_1696</i>         |                             |  | 249 | EKLEFFGDA |           | 1 | Y |
|                                                   |     |     |                             | <i>PMT9312_0850</i>         |  | 132 |           | IQLAWLGD  | 1 | N |
| <i>Prochlorococcus marinus</i> MIT 9313           | 1   | 1,1 | <i>PMT1949</i>              |                             |  | 281 | ERLEFLGD  |           | 1 | Y |
|                                                   |     |     |                             | <i>PMT0651</i>              |  | 132 |           | LQLAWLGD  | 1 | N |
| <i>Prochlorococcus marinus</i> MIT 9515           | 1   | 1,1 | <i>P9515_1791</i>           |                             |  | 249 | EKLEFFGDA |           | 1 | Y |
|                                                   |     |     |                             | <i>P9515_10321</i>          |  | 130 |           | IQLAWLGD  | 1 | N |
| <i>Prochlorococcus marinus</i> NATL1A             | 1   | 1,1 | <i>NATL1_20541</i>          |                             |  | 247 | ENLEFLGD  |           | 1 | Y |
|                                                   |     |     |                             | <i>NATL1_09301</i>          |  | 132 |           | LQLAWLGD  | 1 | N |
| <i>Prochlorococcus marinus</i> NATL2A             | 1   | 1,1 | <i>PMN2A_1179</i>           |                             |  | 247 | ENLEFLGD  |           | 1 | Y |
|                                                   |     |     |                             | <i>PMN2A_0261</i>           |  | 132 |           | LQLAWLGD  | 1 | N |
| <i>Prochlorococcus marinus</i> pastoris CCMP 1986 | 1   | 1,1 | <i>PMM1603</i>              |                             |  | 249 | EKLEFFGDA |           | 1 | Y |
|                                                   |     |     |                             | <i>PMM0949</i>              |  | 130 |           | IQLAWLGD  | 1 | N |
| <i>Prochlorococcus sp.</i> CC931                  | 1   | 1,1 | <i>sync_0200</i>            |                             |  | 254 | EQLEFLGD  |           | 1 | Y |
|                                                   |     |     |                             | <i>sync_1634</i>            |  | 135 |           | LQLAWLGD  | 1 | N |
| <i>Prochlorococcus sp.</i> CC9605                 | 1   | 1,1 | <i>Syncc9605_0149</i>       |                             |  | 241 | ERLEFLGD  |           | 1 | Y |
|                                                   |     |     |                             | <i>Syncc9605_1154</i>       |  | 136 |           | LQLAWIGD  | 1 | N |
| <i>Prochlorococcus sp.</i> CC9902                 | 1   | 1,1 | <i>Syncc9902_0179</i>       |                             |  | 249 | ERLEFLGD  |           | 1 | Y |
|                                                   |     |     |                             | <i>Syncc9902_1305</i>       |  | 143 |           | LQLAWIGD  | 1 | N |
| <i>Prochlorococcus sp.</i> WH 7803                | 1   | 1,1 | <i>SynWH7803_0204</i>       |                             |  | 240 | EQLEFLGD  |           | 1 | Y |
|                                                   |     |     |                             | <i>SynWH7803_1063</i>       |  | 136 |           | LQLAWLGD  | 1 | N |
| <i>Prochlorothrix hollandica</i> PCC 9006         | 3   | 2,1 | <i>Pro9006DRAFT_0098</i>    |                             |  | 242 | EQLEFVGDA |           | 1 | Y |
|                                                   |     |     | <i>Pro9006DRAFT_0103</i>    |                             |  | 256 | ERLEFLGD  |           | 1 | Y |
|                                                   |     |     |                             | <i>Pro9006DRAFT_2926</i>    |  | 132 |           | VLLAYVGD  | 1 | N |
| <i>Pseudanabaena sp.</i> PCC 6802                 | 3   | 2,1 | <i>Pse6802_3090</i>         |                             |  | 220 | QRLEFLGDC |           | 1 | Y |
|                                                   |     |     | <i>Pse6802_2378</i>         |                             |  | 245 | DVLEFVGDS |           | 1 | Y |
|                                                   |     |     |                             | <i>Pse6802_4789</i>         |  | 120 |           | ASLAYLGD  | 1 | N |
| <i>Pseudanabaena sp.</i> PCC 7367                 | 3   | 2,1 | <i>Pse7367_2482</i>         |                             |  | 221 | QRLEFLGD  |           | 1 | Y |
|                                                   |     |     | <i>Pse7367_1487</i>         |                             |  | 269 | EKLEFFGDS |           | 1 | Y |
|                                                   |     |     |                             | <i>Pse7367_2852</i>         |  | 132 |           | AALAYIGD  | 1 | N |
| <i>Spirulina major</i> PCC 6313                   | 3   | 2,1 | <i>Spi6313_3729</i>         |                             |  | 235 | ERLEFLGD  |           | 1 | Y |
|                                                   |     |     | <i>Spi6313_2493</i>         |                             |  | 239 | EQLEFVGDA |           | 1 | Y |
|                                                   |     |     |                             | <i>Spi6313_1300</i>         |  | 150 |           | TALAYIGD  | 1 | N |
| <i>Spirulina subsalsa</i> PCC 9445                | 3   | 4,1 | <i>Spi9445_2508</i>         |                             |  | 227 | ERLEFLGD  |           | 1 | Y |
|                                                   |     |     | <i>Spi9445_1629</i>         |                             |  | 246 | EQLEFVGDA |           | 1 | Y |
|                                                   |     |     | <i>Spi9445_4283</i>         |                             |  | 311 | ERLVVLGGM |           | 1 | N |
|                                                   |     |     | <i>Spi9445_1201</i>         |                             |  | 377 | ERLEFLGDT |           | 1 | Y |
|                                                   |     |     |                             | <i>Spi9445_3328</i>         |  | 151 |           | LALAYLGD  | 1 | N |
| <i>Synechococcus elongatus</i> PCC 7942           | 1   | 1,1 | <i>Syncc7942_1645</i>       |                             |  | 247 | DRLEFLGD  |           | 1 | Y |
|                                                   |     |     |                             | <i>Syncc7942_2120</i>       |  | 138 |           | QALAYLGD  | 1 | N |
| <i>Synechococcus sp.</i> PCC 7002                 | 1   | 2,1 | <i>SYNPCC7002_A0061</i>     |                             |  | 239 | EQLEFIGDA |           | 1 | Y |
|                                                   |     |     | <i>SYNPCC7002_A2542</i>     |                             |  | 258 | ERLEFLGD  |           | 1 | Y |
|                                                   |     |     |                             | <i>SYNPCC7002_A0384</i>     |  | 131 |           | ASLAYVGD  | 1 | N |
| <i>Synechocystis sp.</i> PCC 6803                 | 1   | 2,1 | <i>slr1646</i>              |                             |  | 231 | DRLEFLGD  |           | 1 | Y |
|                                                   |     |     | <i>slr0346</i>              |                             |  | 244 | QQLEFVGDA |           | 1 | Y |
|                                                   |     |     |                             | <i>slr0954</i>              |  | 143 |           | VALAYLGD  | 1 | N |
| <i>Thermosynechococcus elongatus</i> BP-1         | 1   | 0,1 |                             | <i>tlr0428</i>              |  | 151 |           | AALAYFGD  | 1 | N |
| <i>Trichodesmium erythraeum</i> IMS101            | 3   | 3,1 | <i>Tery_2839</i>            |                             |  | 209 | QGLANLGYV |           | 1 | N |
|                                                   |     |     | <i>Tery_2144</i>            |                             |  | 233 | ESLEFIGDA |           | 1 | Y |
|                                                   |     |     | <i>Tery_1105</i>            |                             |  | 250 | EKLEFFGDA |           | 1 | Y |
|                                                   |     |     |                             | <i>Tery_2312</i>            |  | 130 |           | SAWAYLGD  | 1 | N |
| <i>Arabidopsis thaliana</i>                       | N/A | N/A |                             | <i>AT1G55140</i>            |  | 237 |           | ASLAYIGDS | 1 | N |
| <i>Bacillus subtilis</i>                          | N/A | N/A |                             | <i>gnt</i>                  |  | 143 |           | LALAYIGD  | 1 | N |
| <i>Escherichia coli</i> MG1655                    | N/A | N/A | <i>rnc</i>                  |                             |  | 226 | ERLEFLGDS |           | 1 | Y |

Model organisms used in Table I are highlighted in bold.

<sup>8</sup>Shih PM et al. (2013) Improving the coverage of the cyanobacterial phylum using diversity-driven genome sequencing. Proc Natl Acad Sci U S A. 110 (3): 1053-1058

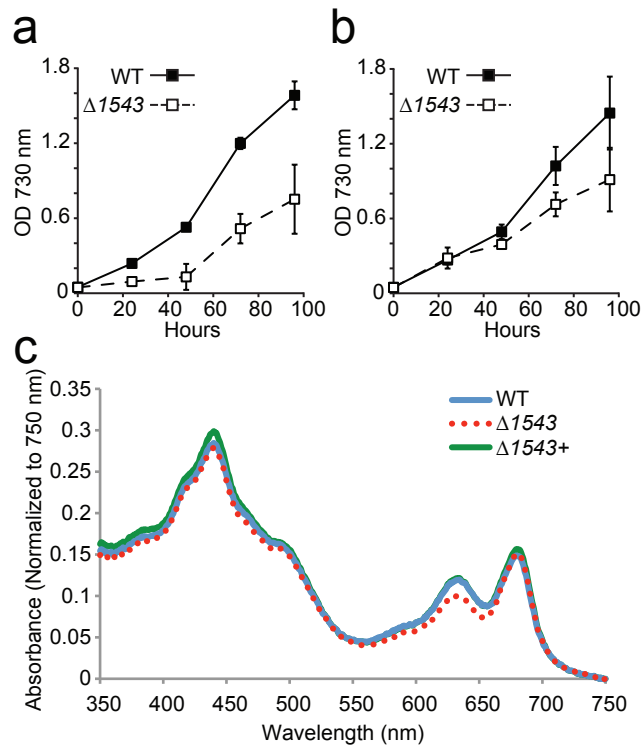

### Online Resource 5 Growth and physiology of $\Delta 1543$ strains

Growth of WT and  $\Delta 1543$  strains in liquid medium (12-well tissue culture plates) with shaking (150 rpm) in the absence (a) and presence (b) of 10 mM  $\text{NaHCO}_3^-$ . Error bars are s.d. of three cultures. Cells were grown in standard conditions as described in “Materials and Methods”. (c) Absorption spectra of WT,  $\Delta 1543$ , and genetically complemented  $\Delta 1543+$  strains following 24 h growth in liquid medium in culture tubes bubbled with air.



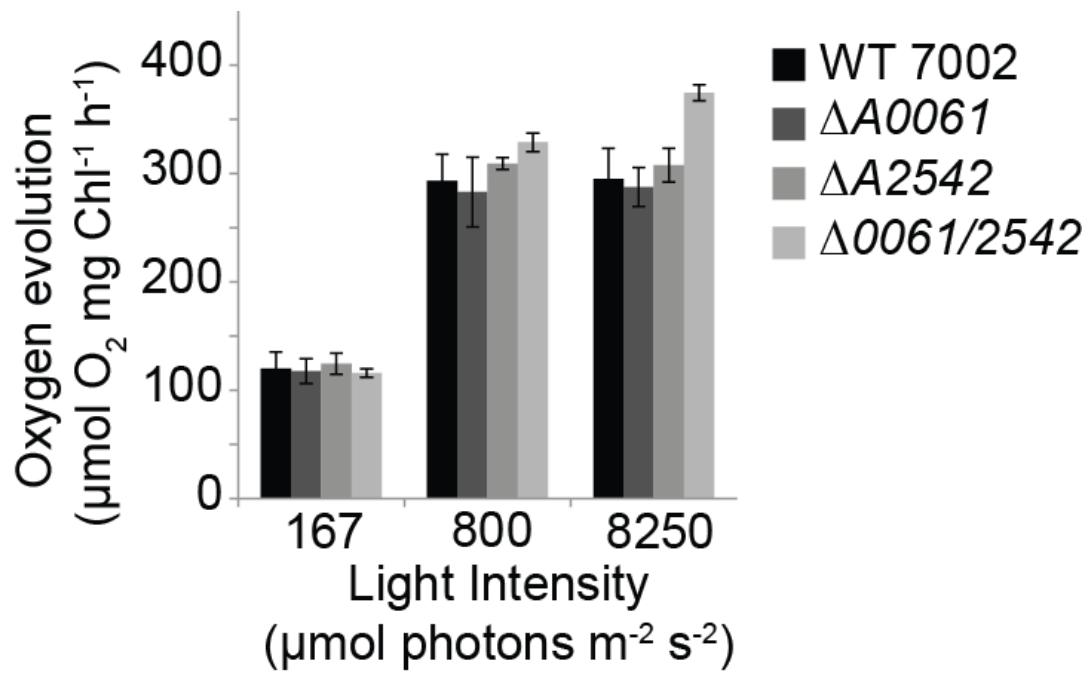

**Online Resource 6** Light-dependent oxygen evolution activity of RNase III mutants

Oxygen evolution was measured as a function of light intensity on a Clark-type electrode in cell solutions suspended at a chlorophyll concentration of 5  $\mu\text{g/ml}$  in A+ media containing 10 mM  $\text{NaHCO}_3^-$  as described in “Materials and Methods”.
